# Supplementary material for: GdIII and GaIII complexes with a new tris-3,4-HOPO ligand as new imaging probes: complex stability, magnetic properties and biodistribution
Source: Royal Society of Chemistry journal article supplement (doi:10.1039/d2dt00066k), 2022-01-01
Supplement: d2dt00066k1.pdf [file d2dt00066k1.pdf]

## Supplementary Material

### **Gd<sup>III</sup> and Ga<sup>III</sup> complexes with a new tris-3,4-HOPO ligand towards new imaging probes: complex stability, magnetic properties and biodistribution**

Silvia Chaves,<sup>a</sup> Karolina Gwizdała,<sup>a,b</sup> Karam Chand,<sup>a</sup> Lurdes Gano,<sup>c</sup> Agnès Pallier,<sup>d</sup> Éva Tóth<sup>d</sup> and M. Amélia Santos<sup>\*,a</sup>

<sup>a</sup>Centro de Química Estrutural, Institute of Molecular Sciences, Departamento de Engenharia Química, Instituto Superior Técnico, Universidade de Lisboa, Av. Rovisco Pais 1, 1049-001, Lisboa, Portugal.

<sup>b</sup>Faculty of Chemistry, Gdansk University of Technology, Gabriela Narutowicza 11/12, 80-233 Gdansk, Poland.

<sup>c</sup>Centro de Ciências e Tecnologias Nucleares (C2TN), Instituto Superior Técnico, Universidade de Lisboa, Estrada Nacional 10, 2695-066 Bobadela LRS, Portugal.

<sup>d</sup>Centre de Biophysique Moléculaire, CNRS UPR 4301, Université d'Orléans, rue Charles Sadron, 45071 Orléans, France.

### Equations used for the analysis of the <sup>17</sup>O NMR and NMRD data<sup>†</sup>

#### (a) <sup>17</sup>O NMR spectroscopy

From the measured <sup>17</sup>O NMR relaxation rates of the paramagnetic solutions,  $1/T_2$  and  $\omega$ , and from the acidified water reference,  $1/T_{2A}$  and  $\omega_A$ , it is possible to calculate the reduced relaxation rates,  $1/T_{2r}$  (Equation S1), where  $1/T_{2m}$  is the relaxation rate of the bound water and  $\Delta\omega_m$  is the chemical shift difference between bound and bulk water,  $\tau_m$  is the mean residence time or the inverse of the water exchange rate  $k_{ex}$  and  $P_m$  is the mole fraction of the bound water.

$$\frac{1}{T_{2r}} = \frac{1}{P_m} \left[ \frac{1}{T_2} - \frac{1}{T_{2A}} \right] = \frac{1}{\tau_m} \frac{T_{2m}^{-2} + \tau_m^{-1} T_{2m}^{-1} + \Delta\omega_m^2}{(\tau_m^{-1} + T_{2m}^{-1})^2 + \Delta\omega_m^2} + \frac{1}{T_{2os}} \quad [S1]$$

The outer sphere contribution to the <sup>17</sup>O relaxation rates  $1/T_{2os}$  can be neglected and equation S1 can be further simplified into Equation S2:

$$\frac{1}{T_{2r}} = \frac{1}{T_{2m} + \tau_m} \quad [S2]$$

The exchange rate is assumed to be described by the Eyring equation (Equation S3), where  $\Delta S^\ddagger$  and  $\Delta H^\ddagger$  are the entropy and enthalpy of activation for the water exchange process, and  $k_{ex}^{298}$  is the exchange rate at 298.15 K. R is the usual gas constant whereas h and  $k_B$  are the Planck and Boltzmann constants, respectively:

$$\frac{1}{\tau_m} = k_{ex} = \frac{k_B T}{h} \exp\left\{\frac{\Delta S^\ddagger}{R} - \frac{\Delta H^\ddagger}{RT}\right\} = \frac{k_{ex}^{298} T}{298.15} \exp\left\{\frac{\Delta H^\ddagger}{R} \left(\frac{1}{298.15} - \frac{1}{T}\right)\right\} \quad [\text{S3}]$$

In the transverse relaxation the scalar contribution,  $1/T_{2sc}$ , is the most important. In Equation S4,  $A/\hbar$  is the scalar coupling constant and  $1/\tau_{si}$  is the sum of the exchange rate and the electron spin relaxation rate constants (Equation S5).

$$\frac{1}{T_{2m}} \cong \frac{1}{T_{2sc}} = \frac{S(S+1)}{3} \left(\frac{A}{\hbar}\right)^2 \left(\tau_{s1} + \frac{\tau_{s2}}{1 + \omega_S^2 \tau_{s2}^2}\right) \quad [\text{S4}]$$

$$\frac{1}{\tau_{si}} = \frac{1}{\tau_m} + \frac{1}{T_{ie}} \quad [\text{S5}]$$

The longitudinal and transverse electronic relaxation rates,  $1/T_{1e}$  and  $1/T_{2e}$  are expressed by Equations S6-S7, where  $\tau_V$  is the correlation time for the modulation of the zero-field-splitting interaction,  $E_V$  the corresponding activation energy and  $\Delta^2$  is the mean square zero-field-splitting energy. We assumed a simple exponential dependence of  $\tau_V$  versus  $1/T$ .

$$\left(\frac{1}{T_{1e}}\right)^{ZFS} = \frac{1}{25} \Delta^2 \tau_V \{4S(S+1) - 3\} \left(\frac{1}{1 + \omega_S^2 \tau_V^2} + \frac{4}{1 + 4\omega_S^2 \tau_V^2}\right) \quad [\text{S6}]$$

$$\left(\frac{1}{T_{2e}}\right)^{ZFS} = \Delta^2 \tau_V \left(\frac{5.26}{1 + 0.372\omega_S^2 \tau_V^2} + \frac{7.18}{1 + 1.24\omega_S^2 \tau_V^2}\right) \quad [\text{S7}]$$

$$\tau_V = \tau_V^{298} \exp\left\{\frac{E_V}{R} \left(\frac{1}{T} - \frac{1}{298.15}\right)\right\} \quad [\text{S8}]$$

## (b) $^1\text{H}$ NMRD

The measured longitudinal proton relaxation rate,  $R_1^{obs}$ , is the sum of the paramagnetic and diamagnetic contributions as expressed in Eq. S9, where  $r_l$  is the proton relaxivity:

$$R_1^{obs} = R_1^d + R_1^p = R_1^d + r_l \times C_{Gd} \quad [S9]$$

The relaxivity can be divided into terms of inner and outer sphere, as follows:

$$r_l = r_{lis} + r_{los} \quad [S10]$$

The inner sphere term is obtained in Equation S11, where  $q$  is the number of inner sphere water molecules.

$$r_{lis} = \frac{1}{1000} \times \frac{q}{55.55} \times \frac{1}{T_{1m}^H + \tau_m} \quad [S11]$$

The longitudinal relaxation rate of inner sphere protons,  $1/T_{1m}^H$  is expressed by Equation S12, where  $r_{GdH}$  is the effective distance between the electron charge and the  $^1\text{H}$  nucleus,  $\omega_l$  is the proton resonance frequency and  $\omega_S$  is the Larmor frequency of the  $\text{Gd}^{\text{III}}$  electron spin. The correlation time,  $\tau_d$ , is dependent on the water residence time,  $\tau_m$ , the electron spin relaxation times,  $T_{ie}$ , and the rotational correlation time,  $\tau_R$ .

$$\frac{1}{T_{1m}^H} = \frac{2}{15} \left( \frac{\mu_0}{4\pi} \right)^2 \frac{\hbar^2 \gamma_I^2 \gamma_S^2}{r_{GdH}^6} S(S+1) \times [3J(\omega_l; \tau_{d1}) + 7J(\omega_S; \tau_{d2})] \quad [S12]$$

For slowly rotating species, the spectral density functions are described the Lipari-Szabo approach.<sup>ii</sup> In this model we distinguish two statistically independent motions; a rapid local motion with a correlation time  $\tau_l$  and a slower global motion with a correlation time  $\tau_g$ . Supposing the global molecular reorientation is isotropic, the relevant spectral density functions are expressed as in Equations (S13-S17), where the general order parameter  $S^2$  describes the degree of spatial restriction of the local motion. If the local motion is isotropic,  $S^2 = 0$ ; if the rotational dynamics is only governed by the global motion,  $S^2 = 1$ .

$$J(\omega_I; \tau_{d1}) = \left( \frac{S^2 \tau_{d1g}}{1 + \omega_I^2 \tau_{d1g}^2} + \frac{(1 - S^2) \tau_{d1}}{1 + \omega_I^2 \tau_{d1}^2} \right) \quad (\text{S13})$$

$$J(\omega_S; \tau_{d2}) = \left( \frac{S^2 \tau_{d2g}}{1 + \omega_S^2 \tau_{d2g}^2} + \frac{(1 - S^2) \tau_{d2}}{1 + \omega_S^2 \tau_{d2}^2} \right) \quad (\text{S14})$$

$$\frac{1}{\tau_{dig}} = \frac{1}{\tau_m} + \frac{1}{\tau_g} + \frac{1}{T_{ie}} \quad i = 1, 2 \quad (\text{S15})$$

$$\frac{1}{\tau} = \frac{1}{\tau_g} + \frac{1}{\tau_l} \quad (\text{S16})$$

$$J_i(\omega_I) = \left( \frac{S^2 \tau_g}{1 + i^2 \omega_I^2 \tau_g^2} + \frac{(1 - S^2) \tau}{1 + i^2 \omega_I^2 \tau^2} \right) \quad i = 1, 2 \quad (\text{S17})$$

The rotational correlation times,  $\tau_g$  and  $\tau_l$  are assumed to have simple exponential temperature dependence with an  $E_R$  activation energy as given in Equation (S18).

$$\tau_v = \tau_v^{298} \exp \left\{ \frac{E_v}{R} \left( \frac{1}{T} - \frac{1}{298.15} \right) \right\} \quad (\text{S18})$$

The outer-sphere contribution can be described by Equation S19 where  $N_A$  is the Avogadro constant, and  $J_{os}$  is its associated spectral density function.

$$r_{los} = \frac{32 N_A \pi}{405} \left( \frac{\mu_0}{4\pi} \right)^2 \frac{\hbar^2 \gamma_S^2 \gamma_I^2}{a_{GdH} D_{GdH}} S(S+1) [3J_{os}(\omega_I, T_{1e}) + 7J_{os}(\omega_S, T_{2e})] \quad [\text{S19}]$$

$$J_{os}(\omega, T_{je}) = \text{Re} \left[ \frac{1 + \frac{1}{4} \left( i\omega \tau_{GdH} + \frac{\tau_{GdH}}{T_{je}} \right)^{1/2}}{1 + \left( i\omega \tau_{GdH} + \frac{\tau_{GdH}}{T_{je}} \right)^{1/2} + \frac{4}{9} \left( i\omega \tau_{GdH} + \frac{\tau_{GdH}}{T_{je}} \right) + \frac{1}{9} \left( i\omega \tau_{GdH} + \frac{\tau_{GdH}}{T_{je}} \right)^{3/2}} \right]$$

$$j = 1, 2 \quad [\text{S20}]$$

The diffusion coefficient for the diffusion of a water proton away from a Gd<sup>III</sup> complex,  $D_{\text{GdH}}$ , is assumed to obey an exponential law versus the inverse of the temperature, with activation energy  $E_{\text{GdH}}$ , as given in Equation S21.  $D_{\text{GdH}}^{298}$  is the diffusion coefficient at 298.15 K.

$$D_{\text{GdH}} = D_{\text{GdH}}^{298} \exp\left\{\frac{E_{\text{GdH}}}{R} \left(\frac{1}{298.15} - \frac{1}{T}\right)\right\} \quad [\text{S21}]$$

<sup>i</sup> Tóth, É.; Helm, L.; Merbach, A.E. Relaxivity of Gadolinium(III) Complexes (Chapter 2) in "The Chemistry of Contrast Agents in Medical Magnetic Resonance Imaging", 2nd edition, Eds. Merbach, A.E.; Helm L.; Tóth É., John Wiley & Sons, 2013 pp: 25-82.

<sup>ii</sup> Dunand, F.A.; Tóth, E.; Hollister, R., Merbach, A.E. Lipari-Szabo approach as a tool for the analysis of macromolecular gadolinium(III)-based MRI contrast agents illustrated by the [Gd(EGTA-BA-(CH<sub>2</sub>)<sub>12</sub>)]<sub>n</sub><sup>n+</sup> polymer. *J. Biol. Inorg. Chem.* **2001**, *6*, 247–255.

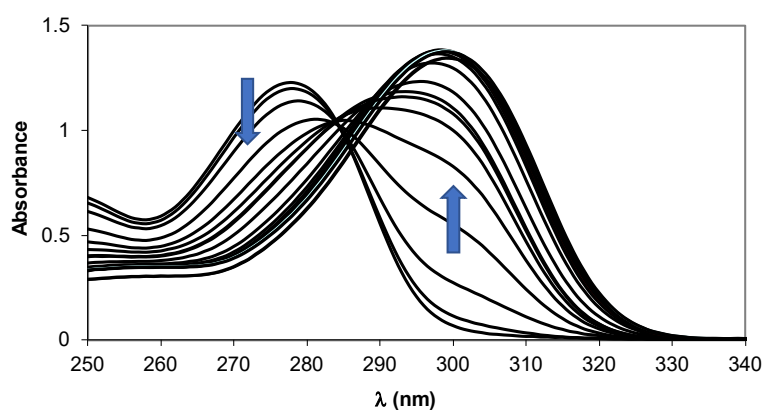

**Figure S1.** Spectrophotometric absorption spectra of the 1:1 Ga<sup>III</sup>/H<sub>3</sub>L<sub>2</sub> system recorded for 0.8 < pH < 6.95 ( $C_L = 5.3 \times 10^{-5}$  M).

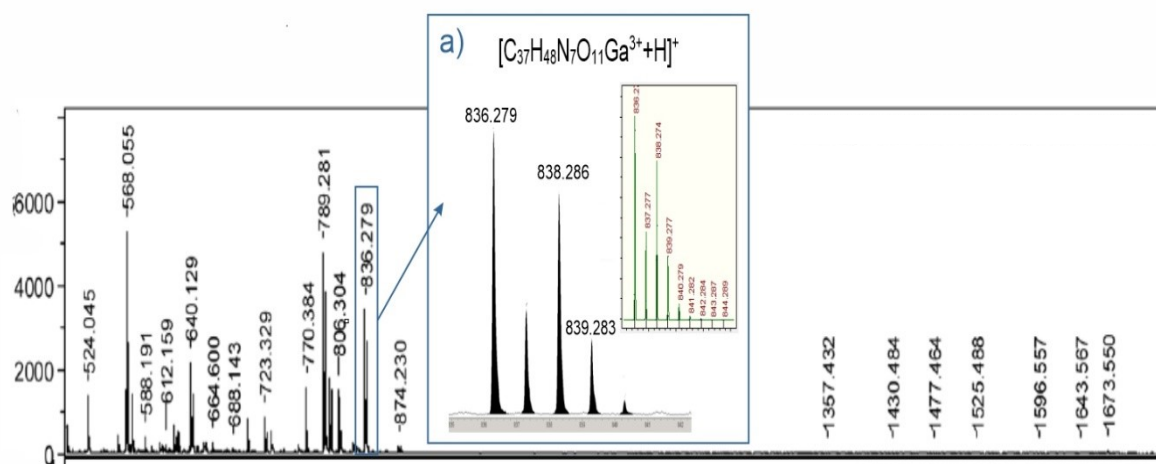

**Figure S2.** MALDI-TOF mass measurement spectrum of a solution of  $Ga^{III}/H_3L2$  (pH= 4.18) with matrix CHCA. The group of peaks at  $m/z$  836/838 displays an isotopic distribution pattern that agrees well with that calculated for  $[Ga^{III}(C_{37}H_{48}N_7O_{11}) + H]^+$  as shown in insert a).

# <sup>1</sup>H NMR

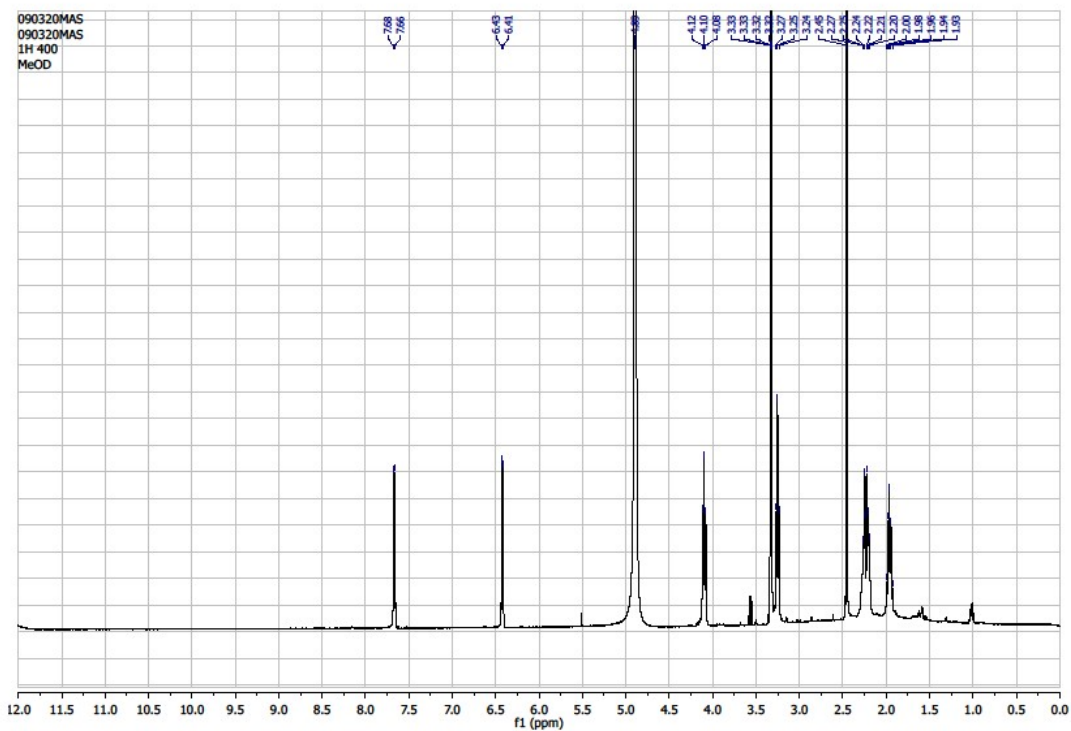

# <sup>13</sup>C NMR

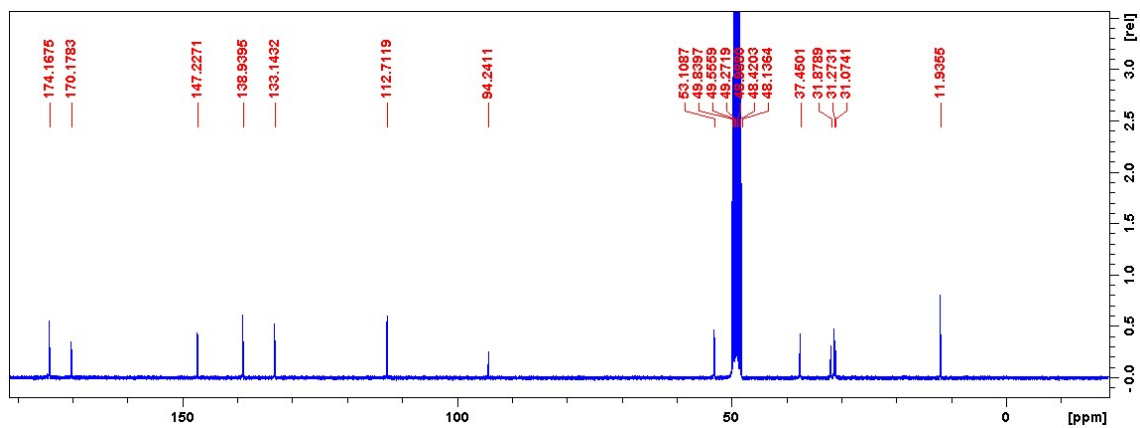

Figure S3. NMR plots of H<sub>3</sub>L<sub>2</sub>.
